# Supplementary material for: Genetic risk variants in New Yorkers of Puerto Rican and Dominican Republic heritage with Parkinson’s disease
Source: PubMed Central journal article supplement (PMC10703927; doi:10.1038/s41531-023-00599-6), 2023-12-07
Supplement: 41531_2023_599_MOESM1_ESM.pdf [file 41531_2023_599_MOESM1_ESM.pdf]

**Supplementary Table 1.** Variants in candidate genes that were found in >3 out of 11 unrelated individuals in our WES sample cohort. Comparison summary between allele frequency (AF) from PD and gnomAD database using the Fisher's exact test. Note: PD: Parkinson's disease; AF: Allele frequency; NFE: European (non-Finnish); n.t.: not tested. Bold: nominally increased frequency of rs2230570 (*EIF4G1*) compared to the Latino population.

| Gene Symbol          | SNP        | PD AF  | All AF  | p-value adjusted | Latino AF       | p-value adjusted | African AF | p-value adjusted | NFE AF  | p-value adjusted |
|----------------------|------------|--------|---------|------------------|-----------------|------------------|------------|------------------|---------|------------------|
| <i>DNAJC6</i>        | rs4915691  | 0.1818 | 0.1733  | 1.000            | 0.1635          | 1.000            | 0.4918     | n.t.             | 0.03717 | 0.1552           |
| <b><i>EIF4G1</i></b> | rs2230570  | 0.1364 | 0.02318 | 0.1573           | <b>0.008691</b> | <b>0.05183</b>   | 0.08806    | 0.9580           | 0.02319 | 0.1311           |
| <i>LRRK2</i>         | rs7308720  | 0.2273 | 0.08740 | 0.2413           | 0.1616          | 0.9146           | 0.1416     | 0.6461           | 0.07153 | 0.1441           |
| <i>MAPT</i>          | rs2258689  | 0.2727 | 0.2762  | n.t.             | 0.3772          | n.t.             | 0.1474     | 0.4689           | 0.2098  | 0.9245           |
| <i>HS1BP3</i>        | rs2305458  | 0.2727 | 0.4834  | n.t.             | 0.4019          | n.t.             | 0.3264     | n.t.             | 0.5729  | n.t.             |
| <i>CTSB</i>          | rs12338    | 0.5000 | 0.3772  | 0.7407           | 0.3509          | 0.5668           | 0.3300     | 0.4532           | 0.3821  | 0.7174           |
| <i>SYNJ1</i>         | rs2254562  | 0.3182 | 0.2779  | 0.9352           | 0.2387          | 0.9183           | 0.2970     | 1.000            | 0.2739  | 0.9539           |
| <i>SMPD1</i>         | rs1050239  | 0.3636 | 0.1921  | 0.3118           | 0.1679          | 0.1560           | 0.1360     | 0.1796           | 0.2301  | 0.4824           |
| <i>LRRK2</i>         | rs11564148 | 0.2273 | 0.2965  | n.t.             | 0.2065          | 1.000            | 0.1822     | 1.000            | 0.3068  | n.t.             |
| <i>CDH23</i>         | rs4747195  | 0.3182 | 0.3054  | >1.000           | 0.4278          | n.t.             | 0.2475     | 0.9037           | 0.2679  | 1.000            |
| <i>CDH23</i>         | rs4747194  | 0.3182 | 0.3121  | >1.000           | 0.4305          | n.t.             | 0.2682     | 0.9992           | 0.2695  | 0.9739           |

|                 |            |        |        |        |        |        |        |        |        |        |
|-----------------|------------|--------|--------|--------|--------|--------|--------|--------|--------|--------|
| <i>PRNP</i>     | rs1799990  | 0.4091 | 0.3098 | 0.8845 | 0.4120 | n.t.   | 0.3382 | 0.9555 | 0.3382 | 0.9249 |
| <i>SLC39A14</i> | rs896378   | 0.4545 | 0.5307 | n.t.   | 0.5020 | n.t.   | 0.7342 | n.t.   | 0.4754 | n.t.   |
| <i>LRRK2</i>    | rs3761863  | 0.6364 | 0.6191 | >1.000 | 0.4968 | 0.6216 | 0.5307 | 0.9004 | 0.6669 | n.t.   |
| <i>EIF4G1</i>   | rs2178403  | 0.8182 | 0.7587 | 1.000  | 0.8233 | n.t.   | 0.9555 | n.t.   | 0.7452 | 1.000  |
| <i>COMT</i>     | rs4680     | 0.3182 | 0.4597 | n.t.   | 0.4046 | n.t.   | 0.3109 | >1.000 | 0.5198 | n.t.   |
| <i>ATXN3</i>    | rs1048755  | 0.2727 | 0.2677 | >1.000 | 0.1550 | 0.4617 | 0.3476 | n.t.   | 0.2417 | 1.000  |
| <i>PARK2</i>    | rs1801582  | 0.3182 | 0.1638 | 0.3582 | 0.1177 | 0.1525 | 0.1748 | 0.3933 | 0.1613 | 0.3778 |
| <i>ATXN2</i>    | rs695871   | 0.3182 | 0.6075 | n.t.   | 0.5657 | n.t.   | 0.3135 | >1.000 | 0.7859 | n.t.   |
| <i>NOTCH3</i>   | rs1044009  | 0.5909 | 0.7130 | n.t.   | 0.5549 | 1.000  | 0.5354 | 0.9585 | 0.7899 | n.t.   |
| <i>LRRK2</i>    | rs2256408  | 0.9545 | 0.9904 | n.t.   | 0.9966 | n.t.   | 0.8974 | 1.000  | 0.9999 | n.t.   |
| <i>EIF4G1</i>   | rs13319149 | 1.000  | 0.9980 | >1.000 | 0.9992 | >1.000 | 0.9990 | >1.000 | 0.9968 | >1.000 |

**Supplementary Table 2.** Genes included in the candidate gene analysis. FTD fronto-temporal dementia; AD Alzheimer’s disease; NBIA Neurodegeneration with brain iron accumulation; DYT dystonia; ET essential tremor; ChAc Chorea-acanthocytosis (VPS13A disease); HDL Huntington disease-like syndrome; MLS McLeod syndrome.

| Gene           | Disease         | Gene            | Disease             | Gene           | Disease                  | Gene           | Disease       |
|----------------|-----------------|-----------------|---------------------|----------------|--------------------------|----------------|---------------|
| <i>ATP6AP2</i> | PD/parkinsonism | <i>POLG</i>     | PD/parkinsonism     | <i>PRKAR1B</i> | PD/parkinsonism, FTD     | <i>APOE</i>    | AD            |
| <i>ATXN2</i>   | PD/parkinsonism | <i>PRKN</i>     | PD/parkinsonism     | <i>CHCHD10</i> | PD/parkinsonism, FTD, AD | <i>APP</i>     | AD            |
| <i>ATXN3</i>   | PD/parkinsonism | <i>RAB29</i>    | PD/parkinsonism     | <i>BDNF</i>    | PD/parkinsonism, AD      | <i>BIN1</i>    | AD            |
| <i>BST1</i>    | PD/parkinsonism | <i>SMPD1</i>    | PD/parkinsonism     | <i>ATP13A2</i> | PD/parkinsonism, NBIA    | <i>CDH23</i>   | AD            |
| <i>CHCHD2</i>  | PD/parkinsonism | <i>SNCA</i>     | PD/parkinsonism     | <i>PLA2G6</i>  | PD/parkinsonism, NBIA    | <i>CNTNAP5</i> | AD            |
| <i>CORO1C</i>  | PD/parkinsonism | <i>TMEM175</i>  | PD/parkinsonism     | <i>GABRA1</i>  | DYT                      | <i>COMT</i>    | AD            |
| <i>CTSB</i>    | PD/parkinsonism | <i>VAMP4</i>    | PD/parkinsonism     | <i>SLC1A2</i>  | ET                       | <i>PSEN1</i>   | AD, FTD       |
| <i>DNAJC6</i>  | PD/parkinsonism | <i>VPS35</i>    | PD/parkinsonism     | <i>FUS</i>     | ET, FTD                  | <i>PSEN2</i>   | AD            |
| <i>DNM3</i>    | PD/parkinsonism | <i>DNAJC12</i>  | PD/parkinsonism/DYT | <i>C9orf72</i> | FTD                      | <i>TOMM40</i>  | AD            |
| <i>EIF4G1</i>  | PD/parkinsonism | <i>GCH1</i>     | PD/parkinsonism/DYT | <i>CHMP2B</i>  | FTD                      | <i>VPS13A</i>  | ChAc          |
| <i>FBXO7</i>   | PD/parkinsonism | <i>SLC30A10</i> | PD/parkinsonism/DYT | <i>GRN</i>     | FTD                      | <i>PRNP</i>    | HDL1, FTD, AD |

|               |                 |                 |                      |               |         |                 |      |
|---------------|-----------------|-----------------|----------------------|---------------|---------|-----------------|------|
| <i>GAK</i>    | PD/parkinsonism | <i>SLC39A14</i> | PD/parkinsonism/DYT  | <i>ITM2B</i>  | FTD     | <i>JPH3</i>     | HDL2 |
| <i>GBA</i>    | PD/parkinsonism | <i>SLC6A3</i>   | PD/parkinsonism/DYT  | <i>SQSTM1</i> | FTD     | <i>XK</i>       | MLS  |
| <i>HTRA2</i>  | PD/parkinsonism | <i>SYNJ1</i>    | PD/parkinsonism/DYT  | <i>TARDBP</i> | FTD     | <i>C19orf12</i> | NBIA |
| <i>LRRK2</i>  | PD/parkinsonism | <i>HS1BP3</i>   | PD/parkinsonism, ET  | <i>TBK1</i>   | FTD     | <i>FTL</i>      | NBIA |
| <i>MTX1</i>   | PD/parkinsonism | <i>LINGO1</i>   | PD/parkinsonism, ET  | <i>UBQLN2</i> | FTD     | <i>PANK2</i>    | NBIA |
| <i>NOTCH3</i> | PD/parkinsonism | <i>LINGO2</i>   | PD/parkinsonism, ET  | <i>CSF1R</i>  | FTD, AD |                 |      |
| <i>PARK7</i>  | PD/parkinsonism | <i>DCTN1</i>    | PD/parkinsonism, FTD | <i>TREM2</i>  | FTD, AD |                 |      |
| <i>PINK1</i>  | PD/parkinsonism | <i>MAPT</i>     | PD/parkinsonism, FTD | <i>VCP</i>    | FTD, AD |                 |      |

Supplementary Figure 1.

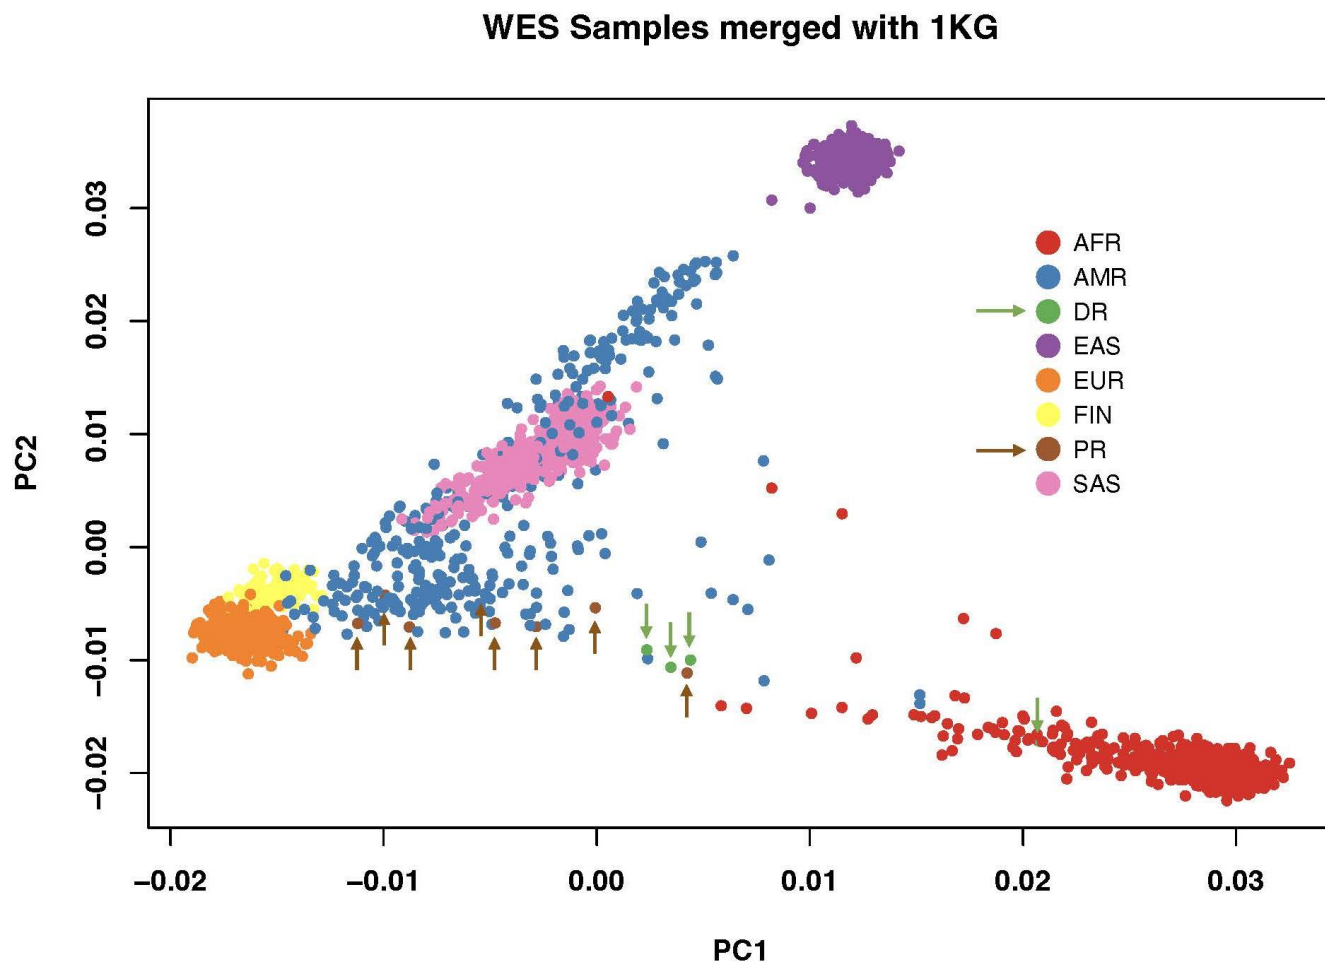

**Principal component analysis for ancestry related markers for patients of Puerto Rican and Dominican ethnicity included in the WES analyses.** All of the different 1KG (1000 Genomes) superpopulations are indicated. Note: PR Puerto Rican patients of our study (brown dots/arrows), DR Dominican patients of our study (green dots/arrows), AFR African, AMR American, EAS East Asian, EUR European, FIN Finnish, SAS South Asian.
